# Supplementary material for: Clinical Factors Associated with Adherence to the Follow-Up Examination after Positive Fecal Occult Blood Test in National Colorectal Cancer Screening
Source: MDPI journal article supplement (doi:10.3390/jcm9010260), 2020-01-18
Supplement: s1 [file s1]

**Table S1.** Clinical conditions in ICD-10 (International Classification of Diseases 10th Revision) code

| Clinical condition                          | ICD-10 code                                                                                                                                                                                                                                                                                                                                                                                                                   | Weight |
|---------------------------------------------|-------------------------------------------------------------------------------------------------------------------------------------------------------------------------------------------------------------------------------------------------------------------------------------------------------------------------------------------------------------------------------------------------------------------------------|--------|
| Charlson Comorbidity Index (CCI)            |                                                                                                                                                                                                                                                                                                                                                                                                                               |        |
| Myocardial Infarction                       | I21, I22, I252                                                                                                                                                                                                                                                                                                                                                                                                                | 1      |
| Congestive Heart Failure                    | I43, I50, I099, I110, I130, I132, I255, I420, I425, I426, I427, I428, I429, P290                                                                                                                                                                                                                                                                                                                                              | 1      |
| Peripheral Vascular Disease                 | I70, I71, I731, I738, I739, I771, I790, I792, K551, K558, K559, Z958, Z959                                                                                                                                                                                                                                                                                                                                                    | 1      |
| Cerebrovascular Disease                     | G45, G46, I60, I61, I62, I63, I64, I65, I66, I67, I68, I69, H340                                                                                                                                                                                                                                                                                                                                                              | 1      |
| Dementia                                    | F00, F01, F02, F03, G30, F051, G311                                                                                                                                                                                                                                                                                                                                                                                           | 1      |
| Chronic Pulmonary Disease                   | J40, J41, J42, J43, J44, J45, J46, J47, J60, J61, J62, J63, J64, J65, J66, J67, I278, I279, J684, J701, J703                                                                                                                                                                                                                                                                                                                  | 1      |
| Connective Tissue Disease-Rheumatic Disease | M05, M32, M33, M34, M06, M315, M351, M353, M360                                                                                                                                                                                                                                                                                                                                                                               | 1      |
| Peptic Ulcer Disease                        | K25, K26, K27, K28                                                                                                                                                                                                                                                                                                                                                                                                            | 1      |
| Mild Liver Disease                          | B18, K73, K74, K700, K701, K702, K703, K709, K717, K713, K714, K715, K760, K762, K763, K764, K768, K769, Z944                                                                                                                                                                                                                                                                                                                 | 1      |
| Diabetes without complications              | E100, E101, E106, E108, E109, E110, E111, E116, E118, E119, E120, E121, E126, E128, E129, E130, E131, E136, E138, E139, E140, E141, E146, E148, E149                                                                                                                                                                                                                                                                          | 1      |
| Diabetes with complications                 | E102, E103, E104, E105, E107, E112, E113, E114, E115, E117, E122, E123, E124, E125, E127, E132, E133, E134, E135, E137, E142, E143, E144, E145, E147                                                                                                                                                                                                                                                                          | 2      |
| Paraplegia and Hemiplegia                   | G81, G82, G041, G114, G801, G802, G830, G831, G832, G833, G834, G839                                                                                                                                                                                                                                                                                                                                                          | 2      |
| Renal Disease                               | N18, N19, N052, N053, N054, N055, N056, N057, N250, I120, I131, N032, N033, N034, N035, N036, N037, Z490, Z491, Z492, Z940, Z992                                                                                                                                                                                                                                                                                              | 2      |
| Cancer                                      | C00, C01, C02, C03, C04, C05, C06, C07, C08, C09, C10, C11, C12, C13, C14, C15, C16, C17, C18, C19, C20, C21, C22, C23, C24, C25, C26, C30, C31, C32, C33, C34, C37, C38, C39, C40, C41, C43, C45, C46, C47, C48, C49, C50, C51, C52, C53, C54, C55, C56, C57, C58, C60, C61, C62, C63, C64, C65, C66, C67, C68, C69, C70, C71, C72, C73, C74, C75, C76, C81, C82, C83, C84, C85, C88, C90, C91, C92, C93, C94, C95, C96, C97 | 2      |
| Moderate or Severe Liver Disease            | K704, K711, K721, K729, K765, K766, K767, I850, I859, I864, I982                                                                                                                                                                                                                                                                                                                                                              | 3      |
| Metastatic Carcinoma                        | C77, C78, C79, C80                                                                                                                                                                                                                                                                                                                                                                                                            | 3      |
| AIDS/HIV                                    | B20, B21, B22, B24                                                                                                                                                                                                                                                                                                                                                                                                            | 6      |

|                                    |                                                    |
|------------------------------------|----------------------------------------------------|
| Anemia                             | D50-59, D60-64                                     |
| Hemorrhagic & Hematologic diseases | D65-D69, D70-D77                                   |
| Osteoporosis                       | M80-M82                                            |
| Depression                         | F06.32, F31.3, F31.4, F32, F33, F341, F38.1, F41.2 |

**Table S2.** Adherence rate of follow-up examination after FOBT (+) from 2009 to 2013

|                      | <b>2009</b>      |            | <b>2010</b>      |            | <b>2011</b>      |            | <b>2012</b>      |            | <b>2013</b>      |            |
|----------------------|------------------|------------|------------------|------------|------------------|------------|------------------|------------|------------------|------------|
|                      | <b>N=143,344</b> |            | <b>N=180,662</b> |            | <b>N=195,249</b> |            | <b>N=232,831</b> |            | <b>N=255,313</b> |            |
|                      | <b>N</b>         | <b>(%)</b> | <b>N</b>         | <b>(%)</b> | <b>N</b>         | <b>(%)</b> | <b>N</b>         | <b>(%)</b> | <b>N</b>         | <b>(%)</b> |
| Compliance group     |                  |            |                  |            |                  |            |                  |            |                  |            |
| within NCSP          | 64,943           | (45.3)     | 80,853           | (44.8)     | 89,238           | (45.7)     | 116,388          | (50.0)     | 123,018          | (48.2)     |
| within KNHIS         | 18,535           | (12.9)     | 23,789           | (13.2)     | 24,090           | (12.3)     | 25,943           | (11.1)     | 26,821           | (10.5)     |
| Non-compliance group | 59,866           | (41.8)     | 76,020           | (42.1)     | 81,921           | (42.0)     | 90,500           | (38.9)     | 105,474          | (41.3)     |

NCSP, Korea National Cancer Screening Program; KNHIS, Korea National Health Insurance Service.
